# Supplementary material for: Extreme Dysbiosis of the Microbiome in Critical Illness
Source: PubMed Central journal article supplement (PMC5007431; doi:10.1128/msphere.00199-16), 2016-08-31

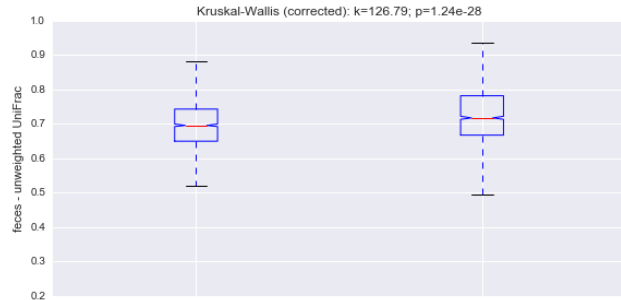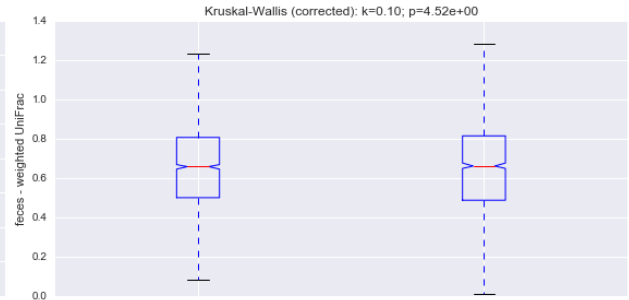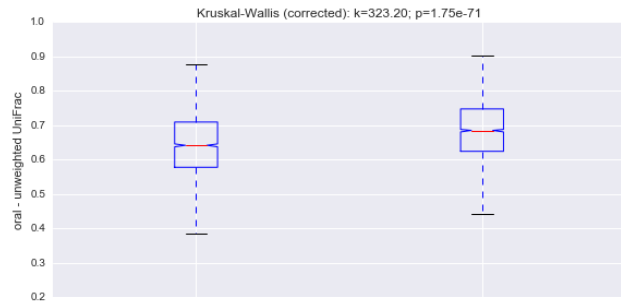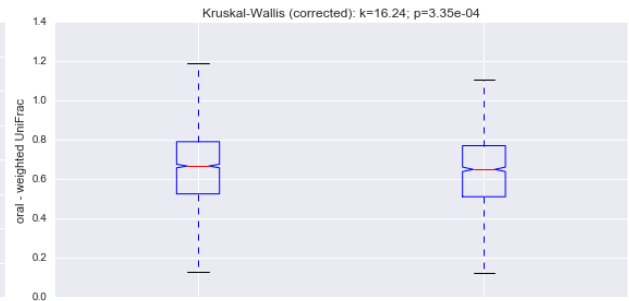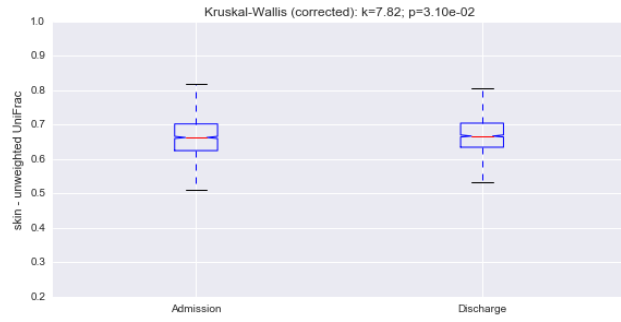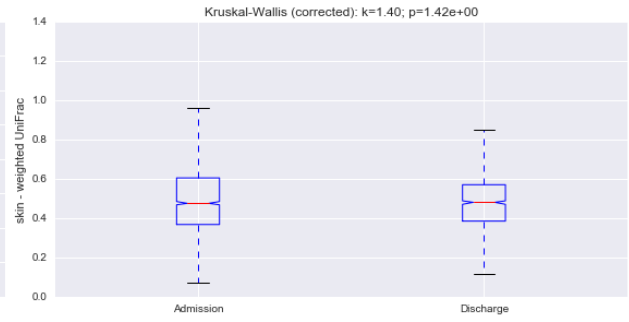

Supplement: sph004162139sf8.pdf [file sph004162139sf8.pdf]
